# Supplementary material
Source: publisher site journal article supplement (https://www.spandidos-publications.com/7880/downloadSupplementary)
Supplement: Supplementary file 1 [file downloadSupplementary]

## Sheet: Sheet1
Table I. 26 STING pathway-related genes.
Gene symbol	Gene name
STING1	Stimulator of interferon genes protein 1
CGAS	Cyclic GMP-AMP synthase
TBK1	TANK-binding kinase 1
MAVS	Mitochondrial antiviral-signaling protein
TRIM56	Tripartite motif-containing 56
TREX1	Three prime repair exonuclease 1
TRIM32	Tripartite motif-containing 32
IFI16	Interferon γ inducible protein 16
STAT6	Signal transducer and activator of transcription 6
IFIT2	Interferon-induced protein with tetratricopeptide repeats 2
IFIT1	Interferon-induced protein with tetratricopeptide repeats 1
DDX41	DEAD-box helicase 41
NLRP4	NLR family pyrin domain containing 4
DTX4	Deltex E3 ubiquitin ligase 4
ZDHHC1	Zinc finger DHHC-type containing 1
PRKDC	Protein kinase DNA-activated catalytic subunit
XRCC5	X-ray repair cross complementing 5
XRCC6	X-ray repair cross complementing 6
ELF4	E74 like ETS transcription factor 4
NLRC3	NLR family CARD domain containing 3
ZDHHC11	Zinc finger DHHC-type containing 11
ARF1	ARF GTPase 1
DDX58	RNA sensor RIG-I
IKBKE	Inhibitor of nuclear factor κB kinase subunit ε
IRF3	Interferon regulatory factor 3
RNF5	Ring finger protein 5
